# Supplementary material for: Maternal Weight Gain in Pregnancy and Risk of Obesity among Offspring: A Systematic Review
Source: J Obes. 2014 Oct 2;2014:524939. doi: 10.1155/2014/524939 (PMC4202338; doi:10.1155/2014/524939)
Supplement: Supplementary file 1 — Supplementary Table 1. Transparent Reporting of Systematic Reviews and Meta-analysis (PRISMA) checklist. Supplementary Table 2. Systematic review search strategies. [file 524939.f1.docx]

**Supplementary Table 1: PRISMA Checklist**

| **Section/topic** | **#** | **PRISMA Checklist item** | **Reported on page #** |
| --- | --- | --- | --- |
| **TITLE** | | |  |
| Title | 1 | Identify the report as a systematic review, meta-analysis, or both. | 1 |
| **ABSTRACT** | | |  |
| Structured summary | 2 | Provide a structured summary including, as applicable: background; objectives; data sources; study eligibility criteria, participants, and interventions; study appraisal and synthesis methods; results; limitations; conclusions and implications of key findings; systematic review registration number. | 2 |
| **INTRODUCTION** | | |  |
| Rationale | 3 | Describe the rationale for the review in the context of what is already known. | 3 |
| Objectives | 4 | Provide an explicit statement of questions being addressed with reference to participants, interventions, comparisons, outcomes, and study design (PICOS). | 3-4 |
| **METHODS** | | |  |
| Protocol and registration | 5 | Indicate if a review protocol exists, if and where it can be accessed (e.g., Web address), and, if available, provide registration information including registration number. | Not applicable |
| Eligibility criteria | 6 | Specify study characteristics (e.g., PICOS, length of follow-up) and report characteristics (e.g., years considered, language, publication status) used as criteria for eligibility, giving rationale. | 4-5 |
| Information sources | 7 | Describe all information sources (e.g., databases with dates of coverage, contact with study authors to identify additional studies) in the search and date last searched. | 4  Suppl Table 2 |
| Search | 8 | Present full electronic search strategy for at least one database, including any limits used, such that it could be repeated. | Suppl Table 2 |
| Study selection | 9 | State the process for selecting studies (i.e., screening, eligibility, included in systematic review, and, if applicable, included in the meta-analysis). | 5 |
| Data collection process | 10 | Describe method of data extraction from reports (e.g., piloted forms, independently, in duplicate) and any processes for obtaining and confirming data from investigators. | 5-6 |
| Data items | 11 | List and define all variables for which data were sought (e.g., PICOS, funding sources) and any assumptions and simplifications made. | Not applicable |
| Risk of bias in individual studies | 12 | Describe methods used for assessing risk of bias of individual studies (including specification of whether this was done at the study or outcome level), and how this information is to be used in any data synthesis. | Not applicable |
| Summary measures | 13 | State the principal summary measures (e.g., risk ratio, difference in means). | 5-6 |
| Synthesis of results | 14 | Describe the methods of handling data and combining results of studies, if done, including measures of consistency (e.g., I2) for each meta-analysis. | 5-6 |
| Risk of bias across studies | 15 | Specify any assessment of risk of bias that may affect the cumulative evidence (e.g., publication bias, selective reporting within studies). | Not applicable |
| Additional analyses | 16 | Describe methods of additional analyses (e.g., sensitivity or subgroup analyses, meta-regression), if done, indicating which were pre-specified. | Not applicable |
| **RESULTS** | | | |  |
| Study selection | 17 | Give numbers of studies screened, assessed for eligibility, and included in the review, with reasons for exclusions at each stage, ideally with a flow diagram. | 6-7  Figure 1 |
| Study characteristics | 18 | For each study, present characteristics for which data were extracted (e.g., study size, PICOS, follow-up period) and provide the citations. | 7-10  Table1, Table 2 |
| Risk of bias within studies | 19 | Present data on risk of bias of each study and, if available, any outcome level assessment (see item 12). | Not applicable |
| Results of individual studies | 20 | For all outcomes considered (benefits or harms), present, for each study: (a) simple summary data for each intervention group (b) effect estimates and confidence intervals, ideally with a forest plot. | Table 1, Table 3, Table 4 |
| Synthesis of results | 21 | Present results of each meta-analysis done, including confidence intervals and measures of consistency. | Not applicable |
| Risk of bias across studies | 22 | Present results of any assessment of risk of bias across studies (see Item 15). | Not applicable |
| Additional analysis | 23 | Give results of additional analyses, if done (e.g., sensitivity or subgroup analyses, meta-regression [see Item 16]). | Not applicable |
| **DISCUSSION** | | | |
| Summary of evidence | 24 | Summarize the main findings including the strength of evidence for each main outcome; consider their relevance to key groups (e.g., healthcare providers, users, and policy makers). | 10-13  Table 3, Table 4 |
| Limitations | 25 | Discuss limitations at study and outcome level (e.g., risk of bias), and at review-level (e.g., incomplete retrieval of identified research, reporting bias). | 17-18 |
| Conclusions | 26 | Provide a general interpretation of the results in the context of other evidence, and implications for future research. | 18 |
| **FUNDING** | | | |
| Funding | 27 | Describe sources of funding for the systematic review and other support (e.g., supply of data); role of funders for the systematic review. | Title page |

*From:*  Moher D, Liberati A, Tetzlaff J, Altman DG, The PRISMA Group (2009). Preferred Reporting Items for Systematic Reviews and Meta-Analyses: The PRISMA Statement. PLoS Med 6(6): e1000097. doi:10.1371/journal.pmed1000097

For more information, visit: **www.prisma-statement.org**.

Page 2 of 2

## Supplementary Table 2. Systematic review search strategies

| **Database** | **Search strategies** |
| --- | --- |
| PubMed | (gestational weight gain OR pregnancy OR maternal weight gain)) AND (child* OR adolescen* OR offspring)) AND  (overweight OR obes* OR adipos* or body mass index)) AND  (longitudinal stud* OR cohort stud* OR follow-up stud*)) AND English[Language]  Search period: inception to 2013/03/18 |
| Web of Science | (TS=(gestational weight gain OR pregnancy OR maternal weight gain)) AND  (TS=(child* OR adolescen* OR offspring)) AND  (TS = (longitudinal stud* or cohort stud* or follow-up stud*)) AND  (TS=(overweight or obes* or adipos* or body mass index)) AND  Language=(English)  *Databases=SCI-EXPANDED Timespan=1900-2012* |
| CINAHL | (gestational weight gain OR pregnancy OR maternal weight gain) AND (child* OR adolescen* OR offspring) AND  (overweight OR obes* OR (adipos* or body mass index)) AND  (longitudinal stud* OR cohort stud* OR follow-up stud*)  Limiter: inception to 2013/03/31, English language, peer reviewed, research article |
| Academic Search Premiere | (gestational weight gain OR pregnancy OR maternal weight gain) AND (child* OR adolescen* OR offspring) AND  (overweight OR obes* OR (adipos* or body mass index)) AND  (longitudinal stud* OR cohort stud* OR follow-up stud*)  Limiter: inception to 2013/03/31, English language, peer reviewed, research article |
